# Supplementary material
Source: PubMed Central journal article supplement (PMC4547893)
Supplement: embj0034-1875-sd6.pdf [file embj0034-1875-sd6.pdf]

Table S1

| Gene        | Detector | Forward                 | Reverse                |
|-------------|----------|-------------------------|------------------------|
| Gja5        | SYBR     | CAGCAGCCAGAGCCTGAAGAAGC | GAGTAGGAGACCGAGGCCGAGC |
| Sun-1       | SYBR     | CCTGTGCTAGATGAGTCCCTG   | ATTTCCCTGAGTGGCAGCTTT  |
| Sun-2       | SYBR     | GAGCCCATCCAGACCTTCTAT   | CAGAAGACTAGTGGGCAGGCT  |
| Itgb6       | SYBR     | CTCACGGGTACAGTAACGCA    | AAATGAGCTCTCAGGCAGGC   |
| OPN         | SYBR     | AAACCAGCCAAGGTAAGCCT    | TCAGTCACTTTCACCGGGAG   |
| GAPD        | SYBR     | GTGCAGTGCCAGCCTCGTCC    | GCCACTGCAAATGGCAGCCC   |
| Myh6        | taqman   | Mm00440359_m1           |                        |
| Myh7        | taqman   | Mm00600555_m1           |                        |
| p21(CDKN1A) | taqman   | Mm00432448_m1           |                        |
| GAPD        | taqman   | 4352339E                |                        |
| ACTB        | taqman   | 4352341E                |                        |
| miR-1       | taqman   | 4373161                 |                        |
| snoRNA202   | taqman   | 4427975                 |                        |
